# Supplementary material
Source: MDPI journal article supplement (https://www.mdpi.com/2411-5150/5/4/52)
Supplement: s1 [file s1]

**Supplementary Figure S2:** English version of the form used for the Visual Aura Mapping Study. (French version available from the author on request: [franw@yorku.ca](mailto:franw@yorku.ca))

**MIGRAINE RESEARCH PROJECT - MCGILL UNIVERSITY**

**Migraine Aura Observation Form**

Date: \_\_\_\_\_ Subject # \_\_\_\_\_

\*\*\*\*\* FILL OUT THIS FORM ONLY DURING A MIGRAINE EPISODE \*\*\*\*\*

1. On which side you see the aura? left \_\_\_\_ right \_\_\_\_ both \_\_\_\_

2. Time at beginning of aura: \_\_\_\_\_ (to the nearest minute)  
Time at end of aura: \_\_\_\_\_ (to the nearest minute)

3. Observe your aura carefully, preferably in a dim room, and describe what you see:  
spots \_\_\_\_ zig zag lines \_\_\_\_ other lines \_\_\_\_  
other (describe) \_\_\_\_\_  
Please try to draw an example of what you see on the back of this form

the spots / zig zag / lines / other are: bright \_\_\_\_ dark \_\_\_\_ both \_\_\_\_  
(pay particular attention to whether there are dark elements)

do you see: blind area(s), missing parts yes \_\_\_\_ no \_\_\_\_  
blurred area(s) yes \_\_\_\_ no \_\_\_\_

the aura is: flashing / flickering / rolling yes \_\_\_\_ no \_\_\_\_  
(if yes, circle which description applies best)  
moving or drifting across the visual field yes \_\_\_\_ no \_\_\_\_

do you see any colour? (excluding black and white) yes \_\_\_\_ no \_\_\_\_  
if yes, which ones? \_\_\_\_\_  
If possible draw or describe the form/shape of coloured areas on the back of this form.

4. Attach the map to folder or wall. Use the string and button to position your eyes at the correct distance (this is very important).  
**While fixating the central cross:**  
- Mark the position where you first see the aura.  
- At 5 min intervals, mark the position of the aura and write the time beside the mark  
(always fixate on the cross while marking position).

5. Please fill out during your headache (if any):

Do you have a headache? yes \_\_\_\_ no \_\_\_\_  
if yes: on which side? left \_\_\_\_ right \_\_\_\_ both \_\_\_\_  
when did it start? \_\_\_\_\_  
how long did it last? \_\_\_\_\_

---

• Did you experience any other unusual sensations (sounds, smells, tastes, numbness, tingling) during your migraine episode? yes \_\_\_\_ no \_\_\_\_ If yes, please describe them on the back of this form.

• If there was anything striking or unusual about your visual aura please make a note of this on the back.

• Please indicate on the back of the form anything that you think might have triggered this episode.

**PLEASE MAIL THIS FORM BACK AS SOON AS POSSIBLE**

Back of form:

Medications:

Did you take any medication during this episode? yes \_\_\_\_ no \_\_\_\_

Which ones: \_\_\_\_\_

When: \_\_\_\_\_
