# Supplementary material
Source: MDPI journal article supplement (https://www.mdpi.com/2411-5150/5/4/52)
Supplement: s1 [file s1]

**Supplementary Table S1: Episodes evaluated by ICHD-3 criteria.** For each recorded episode, each ICHD-3 aura characteristic is evaluated as YES (clearly met), NO (clearly fails), or INC (inconclusive - insufficient information provided to evaluate). Durations of prolonged auras (>60 min) in red. Overall rating for episode (top line) based on criterion of at least three characteristics met.

|                                                                     |                                       |                                             |                                            |                                           |                                            |                           |
|---------------------------------------------------------------------|---------------------------------------|---------------------------------------------|--------------------------------------------|-------------------------------------------|--------------------------------------------|---------------------------|
| <b>Participant 1</b>                                                | <b>Episode 1</b>                      | <b>Episode 2</b>                            | <b>Episode 3</b>                           | <b>Episode 4</b>                          | <b>Episode 5</b>                           | <b>Episode 6</b>          |
| At least three of the following six characteristics:                | <b>YES</b>                            | <b>YES</b>                                  | <b>YES</b>                                 | <b>YES</b>                                |                                            |                           |
| at least one aura symptom spreads gradually over ≥5 minutes         | YES SS maps                           | YES SS maps                                 | YES from SS maps                           | Yes from SS maps                          |                                            |                           |
| two or more aura symptoms occur in succession                       | YES V,SS Offset 3 min                 | YES V,SS. Offset 23 min                     | YES V,SS Offset 5 min                      | YES V,SS Offset 10 min                    |                                            |                           |
| each individual aura symptom lasts 5-60 minutes                     | YES (V=13; SS=42)                     | NO (V=34; <b>SS=92</b> )                    | NO (V=44; <b>SS=105</b> )                  | NO (V=45; <b>SS=65</b> )                  |                                            |                           |
| at least one aura symptom is unilateral                             | YES both (L)                          | YES SS (L)                                  | YES V (R ), SS (L)                         | YES. V (L)                                |                                            |                           |
| at least one aura symptom is positive                               | INC                                   | INC                                         | INC                                        | INC                                       |                                            |                           |
| the aura is accompanied, or followed within 60 minutes, by headache | INC HA(B) no time; Meds within 60 min | INC HA(B) (no onset time)                   | INC HA(L) (no onset time) Meds during aura | INC HA(B) (no time) Meds within 60 min    |                                            |                           |
|                                                                     |                                       |                                             |                                            |                                           |                                            |                           |
| <b>Participant 2</b>                                                |                                       |                                             |                                            |                                           |                                            |                           |
| At least three of the following six characteristics:                | <b>YES</b>                            | <b>YES</b>                                  |                                            |                                           |                                            |                           |
| at least one aura symptom spreads gradually over ≥5 minutes         | YES (SS maps)                         | YES V and SS                                |                                            |                                           |                                            |                           |
| two or more aura symptoms occur in succession                       | YES. V, SS Offset 5 min               | YES V, SS Offset 30 min                     |                                            |                                           |                                            |                           |
| each individual aura symptom lasts 5-60 minutes                     | YES (V=25; SS=45)                     | NO ( <b>V=105</b> ; SS=60)                  |                                            |                                           |                                            |                           |
| at least one aura symptom is unilateral                             | YES V (L), SS (L)                     | YES V (L), SS (L)                           |                                            |                                           |                                            |                           |
| at least one aura symptom is positive                               | YES V, SS                             | YES V, SS                                   |                                            |                                           |                                            |                           |
| the aura is accompanied, or followed within 60 minutes, by headache | INC – HA(L) (no onset time)           | INC- HA(L) (no onset time)                  |                                            |                                           |                                            |                           |
|                                                                     |                                       |                                             |                                            |                                           |                                            |                           |
| <b>Participant 3</b>                                                |                                       |                                             |                                            |                                           |                                            |                           |
| At least three of the following six characteristics:                | <b>PROBABLE</b>                       |                                             |                                            |                                           |                                            |                           |
| at least one aura symptom spreads gradually over ≥5 minutes         | YES (SS maps)                         |                                             |                                            |                                           |                                            |                           |
| two or more aura symptoms occur in succession                       | YES SS, V Offset 25 min               |                                             |                                            |                                           |                                            |                           |
| each individual aura symptom lasts 5-60 minutes                     | INC SS=15; V unknown (>20) sleep      |                                             |                                            |                                           |                                            |                           |
| at least one aura symptom is unilateral                             | NO both bilateral                     |                                             |                                            |                                           |                                            |                           |
| at least one aura symptom is positive                               | INC tunnel vision, numbness           |                                             |                                            |                                           |                                            |                           |
| the aura is accompanied, or followed within 60 minutes, by headache | INC awoke with HA(L) within 2 hr      |                                             |                                            |                                           |                                            |                           |
|                                                                     |                                       |                                             |                                            |                                           |                                            |                           |
| <b>Participant 4</b>                                                |                                       |                                             |                                            |                                           |                                            |                           |
| At least three of the following six characteristics:                | <b>YES</b>                            | <b>YES</b>                                  | <b>YES</b>                                 | <b>YES</b>                                | <b>YES</b>                                 | <b>YES</b>                |
| at least one aura symptom spreads gradually over ≥5 minutes         | YES (SS maps)                         | INC – can’t evaluate spread from map        | YES (SS maps)                              | INC SS noted absence of spread; no V info | INC SS noted absence of spread             | INC no info provided      |
| two or more aura symptoms occur in succession                       | YES V,SS Offset 20 min                | YES V,SS Offset 2 min                       | YES V,SS Offset 55 min                     | YES V,SS Offset 75 min                    | YES V,SS Offset 50 min                     | YES V,SS Offset 27 min    |
| each individual aura symptom lasts 5-60 minutes                     | YES (V=20; SS=60)                     | YES (V=15; SS=23)                           | YES (V=15; SS=20)                          | YES (V=5; SS=20)                          | YES (V=35; SS=15)                          | YES (V=15; SS=33)         |
| at least one aura symptom is unilateral                             | YES both L                            | YES V(R), SS(L)                             | YES both R                                 | YES SS(L)                                 | YES both L                                 | YES V(R), SS(L)           |
| at least one aura symptom is positive                               | INC                                   | INC                                         | INC                                        | YES V                                     | YES V                                      | INC                       |
| the aura is accompanied, or followed within 60 minutes, by headache | INC HA(L) (no time); Meds during aura | YES HA(L) during aura                       | YES HA(R) during aura                      | INC HA(R) (no time); Meds during aura     | INC HA(L) (no time); Meds during aura      | YES HA(Bilat)             |
|                                                                     |                                       |                                             |                                            |                                           |                                            |                           |
| <b>Participant 5</b>                                                |                                       |                                             |                                            |                                           |                                            | Sept 18, 1996 #10         |
| At least three of the following six characteristics:                | <b>YES</b>                            | <b>YES</b>                                  | <b>YES</b>                                 | <b>YES</b>                                | <b>YES</b>                                 | <b>YES</b>                |
| at least one aura symptom spreads gradually over ≥5 minutes         | YES V                                 | YES V                                       | YES V                                      | YES V                                     | YES, V                                     | YES V                     |
| two or more aura symptoms occur in succession                       | YES V, SS Offset 20 min               | YES V,SS. Offset 45 min                     | YES V,SS Offset 17 min                     | V,SS Offset 10 min                        | YES V,SS Offset 25 min                     | YES V,S Offset 5 min      |
| each individual aura symptom lasts 5-60 minutes                     | NO (V=25; <b>SS = 240</b> )           | INC (V=25; SS end time not recorded)        | YES (V=17; SS=5)                           | NO (V=35; <b>SS= 420</b> )                | NO (V=30; <b>SS = 200</b> )                | NO (V=30; <b>SS=80</b> )  |
| at least one aura symptom is unilateral                             | YES V(L), SS(R)                       | YES V(L)                                    | YES V(L) (SS bilateral face)               | YES V(L), (SS limbs Bilat face R)         | YES (L), SS(R)                             | YES V(R), SS limbs bilat  |
| at least one aura symptom is positive                               | YES V, SS                             | YES V,SS                                    | YES V,SS                                   | YES V,SS                                  | YES V,SS                                   | YES V                     |
| the aura is accompanied, or followed within 60 minutes, by headache | YES HA(B)                             | YES HA(R)                                   | YES HA(B)                                  | YES HA(R)                                 | YES HA(R)                                  | YES HA(B)                 |
|                                                                     |                                       |                                             |                                            |                                           |                                            |                           |
| <b>Participant 6</b>                                                |                                       |                                             |                                            |                                           |                                            |                           |
| At least three of the following six characteristics:                | <b>YES</b>                            | <b>YES</b>                                  | <b>YES</b>                                 | <b>YES</b>                                | <b>NO</b>                                  | <b>YES</b>                |
| at least one aura symptom spreads gradually over ≥5 minutes         | YES V, SS maps                        | YES V, SS shift from bilateral to left      | YES SS maps                                | YES SS maps                               | INC do not have map for first 2 hr         | YES V, SS                 |
| two or more aura symptoms occur in succession                       | YES (SS, V) Offset 10 min             | NO Simultaneous onset; SS lasted longer     | YES (SS, V) Offset 40 min                  | NO Simultaneous onset; SS lasted longer   | YES (SS, V). Offset 285 min                | NO Simultaneous onset;    |
| each individual aura symptom lasts 5-60 minutes                     | NO (V=40; <b>SS=100</b> )             | YES (V=40; SS=50)                           | NO (V=50; <b>SS=120</b> )                  | NO (V=45; <b>SS=95</b> )                  | NO (V=15; <b>SS = 11 hours</b> )           | NO (V>35; <b>SS=105</b> ) |
| at least one aura symptom is unilateral                             | YES V(R), SS(R)                       | NO both start bilateral; then stronger left | YES V(R)                                   | NO both bilateral                         | NO both bilateral                          | NO both bilateral         |
| at least one aura symptom is positive                               | YES SS                                | YES SS                                      | NO                                         | YES V                                     | NO numbness & tunnel vision                | YES V                     |
| the aura is accompanied, or followed within 60 minutes, by headache | YES HA(R) started with aura           | INC HA(B) onset time not noted              | YES HA(R) during visual aura               | YES HA(B) during auras                    | YES HA(R) 3 hr before aura; lasted all day | YES HA(B) during auras    |

Supplementary Table S1 (Cont’d)

|                                                                     |                                 |                                               |                                              |  |  |  |
|---------------------------------------------------------------------|---------------------------------|-----------------------------------------------|----------------------------------------------|--|--|--|
|                                                                     | Episode 7                       | Episode 8                                     | Episode 9                                    |  |  |  |
| Participant 5                                                       |                                 |                                               |                                              |  |  |  |
| At least three of the following six characteristics:                | YES                             |                                               |                                              |  |  |  |
| at least one aura symptom spreads gradually over ≥5 minutes         | YES V                           |                                               |                                              |  |  |  |
| two or more aura symptoms occur in succession                       | YES V,S Offset 30 min           |                                               |                                              |  |  |  |
| each individual aura symptom lasts 5-60 minutes                     | NO (V=20; SS=240)               |                                               |                                              |  |  |  |
| at least one aura symptom is unilateral                             | YES V(L), (SS B face and limbs) |                                               |                                              |  |  |  |
| at least one aura symptom is positive                               | YES V, SS                       |                                               |                                              |  |  |  |
| the aura is accompanied, or followed within 60 minutes, by headache | YES H(R)                        |                                               |                                              |  |  |  |
|                                                                     |                                 |                                               |                                              |  |  |  |
|                                                                     |                                 |                                               |                                              |  |  |  |
| Participant 6                                                       |                                 |                                               |                                              |  |  |  |
| At least three of the following six characteristics:                | YES                             | YES                                           | YES                                          |  |  |  |
| at least one aura symptom spreads gradually over ≥5 minutes         | YES SS maps                     | YES V, SS maps                                | YES V,SS maps                                |  |  |  |
| two or more aura symptoms occur in succession                       | YES SS, V Offset 30 min         | YES SS, V Offset 15 min                       | YES SS,V Offset 60 min                       |  |  |  |
| each individual aura symptom lasts 5-60 minutes                     | NO (V=180 min; SS = 240 min)    | NO (V=50; SS=85)                              | NO (V=>40 (sleep); SS-105)                   |  |  |  |
| at least one aura symptom is unilateral                             | NO both bilateral from maps     | NO both bilateral (face R, hand L, V R>L)     | YES V(R)                                     |  |  |  |
| at least one aura symptom is positive                               | YES SS                          | YES V, SS                                     | NO numbness and blurred grey areas of vision |  |  |  |
| the aura is accompanied, or followed within 60 minutes, by headache | YES HA(R) during auras          | YES HA(B/R) 10 min after 2 <sup>nd</sup> aura | YES HA(R) preceded and during SS aura        |  |  |  |
|                                                                     | B-B-R                           | B-B-B                                         | R-B-R                                        |  |  |  |
